# Metformin for cancer and aging prevention: is it a time to make the long story short?

Vladimir N. Anisimov<sup>1</sup>

<sup>1</sup> Department of Carcinogenesis and Oncogerontology, N.N.Petrov Research Institute of Oncology, St.Petersburg, Russian Federation

**Correspondence to:** Vladimir N. Anisimov, **email:** aging@mail.ru

**Keywords:** metformin, antidiabetic biguanides, cancer prevention, aging, rodents

**Received:** October 06, 2015

**Accepted:** November 17, 2015

**Published:** November 18, 2015

## ABSTRACT

**During the last decade, the burst of interest is observed to antidiabetic biguanide metformin as candidate drug for cancer chemoprevention. The analysis of the available data have shown that the efficacy of cancer preventive effect of metformin (MF) and another biguanides, buformin (BF) and phenformin (PF), has been studied in relation to total tumor incidence and to 17 target organs, in 21 various strains of mice, 4 strains of rats and 1 strain of hamsters (inbred, outbred, transgenic, mutant), spontaneous (non- exposed to any carcinogenic agent) or induced by 16 chemical carcinogens of different classes (polycyclic aromatic hydrocarbons, nitroso compounds, estrogen, etc.), direct or indirect (need metabolic transformation into proximal carcinogen), by total body X-rays and  $\gamma$ - irradiation, viruses, genetic modifications or special high fat diet, using one stage and two-stage protocols of carcinogenesis, 5 routes of the administration of antidiabetic biguanides (oral gavage, intraperitoneal or subcutaneous injections, with drinking water or with diet) in a wide ranks of doses and treatment regimens. In the majority of cases (86%) the treatment with biguanides leads to inhibition of carcinogenesis. In 14% of the cases inhibitory effect of the drugs was not observed. Very important that there was no any case of stimulation of carcinogenesis by antidiabetic biguanides. It was conclude that there is sufficient experimental evidence of anti-carcinogenic effect of antidiabetic biguanides.**

## INTRODUCTION

Cancer prevention is one of main goals of fundamental and clinical oncology. As it was stressed in the preamble to the IARC Handbooks of Cancer Prevention, preventive strategies embrace chemical, immunological, dietary and behavioral interventions that may retard, block or reverse carcinogenic processes or reduce underlying risk factors.[1]

In fourteen volumes of this series of handbooks were collected and critically evaluated available data on cancer preventing effect of non-steroidal anti-inflammatory drugs, carotenoids, vitamin A, retinoids, indoles and isothiocyanates, some fruits and vegetables, tobacco and body weight control programs, breast and cervix cancer screening programs (www.iarc.fr). During the last decade there is a burst of interest to cancer prevention potential of antidiabetic biguanide metformin. More than 120 million prescriptions of MF are written yearly for treatment of

type 2 diabetes mellitus and this may have already saved more people from cancer death than any drug in history.[2] Recently it was announced an ambition project of clinical trial called TAME (Targeting Aging with Metformin) proposed by Nir Barzilai and colleagues (Albert Einstein College of Medicine in New York).[3, 4]. They are going to give MF during 5-7 years to 3,000 people aged 70-80 years who already has one or two of three age-associated diseases (heart disease, cancer, cognitive decline). Authors are expected delay these pathologies and death. Persons with type 2 diabetics (T2D) cannot be enrolled due to they were already treated with MF. This project based on the data on the increase of life span of mice and rats given MF and on results of clinical observation on 15% increase in survival of T2D patients primarily treated with MF as compared with healthy people without diabetes. [5] These findings and planning of the TAME clinical trial rise the question on the safety of long-term administration of MF in non-diabetic people.

In present article, we evaluated available results of preclinical studies on anti-carcinogenic and geroprotector effects of metformin (N,N-dimethylbiguanide, MF) and other antidiabetic biguanides phenformin (1-phenylethylbiguanide, PF) and buformin (1-butybiguanide hydrochloride, BF) and perspectives of its wide introduction in clinical practice. We focused mainly on end-point results of studies, doses and route of administration of biguanides to get answers to two critical questions: (1) are biguanides effective in cancer prevention in non-diabetic organism? and (2) are they safe in long-term treatment? Mechanisms of geroprotective, anti-carcinogenic and antitumor effects of biguanides are intensively studied at present. There are a lot of comprehensive reviews on this topic, [6-15] which could be recommend to readers.

### **Antidiabetic biguanides: Milestones in the drugs history**

In the early 1900s, guanidine was identified as active compound of botanic medicine *Galega officinalis* (French Lilac) commonly used in medieval Europe for the treatment of polyurea in diabetic patients.[15] This was followed by development of antidiabetic biguanides in the 1920s, however due to the discovery of insulin in 1921 only thirty years late the first biguanides (phenformin, buformin and metformin) were synthesized. The drugs were approved in the middle of last century in the USA and Europe for the treatment of T2D.

In the 1971, Dilman [16] proposed that antidiabetic biguanides may be promising as a potent anti-aging and anti-cancer drugs. In the middle of 1970s Dilman at the N.N. Petrov Research Institute of Oncology (St. Petersburg, Russia) initiated the series of experiments in mice and rats to test this hypothesis. In 1974, it was shown in the first time that PF inhibits 7,12-dimethylbenz(a)anthracene (DMBA)-induced mammary carcinogenesis in female rats.[17] Five years later, the first article on the inhibitory effect of PF on spontaneous mammary carcinogenesis and life span extension in cancer-prone female C3H/Sn mice has been published. [18, 19] At the same period it have been reported on inhibitory effect of both PF and BF on spontaneous carcinogenesis in female rats, [20, 21] and on carcinogenesis induced by DMBA or N-nitrosomethylurea (NMU) in mammary gland [22-24], by 1,2-dimethylhydrazine (DMH) – in colon [25, 26], by N-nitrosoethylurea (NEU) and N-nitrosomethylurea (NMU) in kidney and nervous system [27, 28], by 20-methylcholanthrene – in soft tissues, [29] by X-rays - in lymphoid tissue [30] In 1987, we summarized the results of experimental studies on anti-carcinogenic effects of antidiabetic biguanides in special section of our book “Carcinogenesis and Aging”, Boca Raton, FL: CRC Press, 1987, vol.2. [31]

Dilman [32] proposed the idea of metabolic rehabilitation for cancer patients giving them biguanides and maintaining on calorie restricted diet. Treatment with PF decreased incidence of metastases and increased 5-year survival in breast, stomach and colon cancers patients [33, 34] In the late 1970s due to high incidence of adverse effects (severe lactic acidosis) phenformin was forbidden for clinical use and metformin possessed in much less adverse effects started toward nowadays.[15, 34]

After the wave of publications on anti-carcinogenic effect of PF and BF in 1974-1985 with absolute peak in 1980-1982, during next 20 years only one report appeared on inhibitory effect of MF on chemical carcinogenesis of pancreas in hamsters.[35] It seems that interest to this effect was lost, and these very impressive results have been forgotten. In 2003 we have published results of our early studies on anti-carcinogenic and geroprotective effects of antidiabetic biguanides recalculated at Max-Planck Institute for Demographic Research at Rostock, Germany [36] and started new series of experiments using metformin.

In 2005 we firstly have found that treatment with MF inhibits mammary carcinogenesis and increases the life span of female HER-2/neu transgenic mice. [37] At the same year, Evans et al. [38] and then Bowker et al. [39] reported that treatment with metformin decreased the breast cancer risk. These studies induced the second huge wave, like tsunami - an exponential growth of number of publications on MF and cancer. A search in the PubMed on key words “metformin and cancer” shows 1 publication in 1995; 23 articles in 2000, 88 - in 2005, 175 - in 2010, 281 - in 2012, 350 - in 2013, 408 - in 2014. From 1<sup>st</sup> January to 1<sup>st</sup> October, 2015 - 330 articles on the topic appeared in PubMed! There are a near hundred excellent reviews and meta-analyzes of epidemiological data on MF effect on cancer risk in type 2 diabetes patients. We refer readers to some of them.[40-44]

During 2005-2010 nineteen original research articles with results of studies on anti-carcinogenic effect of MF in rodent models have been published, and in 2011- 2015 – 27 papers. The available data on the results of *in vivo* studies on effects of biguanides involved more than 20 experimental models of carcinogenesis are summarized in the Table 1. They included models of spontaneous carcinogenesis (in rat and mice), chemical carcinogenesis induced by 16 different chemical carcinogens and tumor promoters, viruses, dietetic modifications, ionizing irradiation, transgenic and knockout mice. Antidiabetic biguanides were given with diet, drinking water, orally (gavage), intraperitoneally or subcutaneously. To the date, we found in total 65 publications reported results of original studies. Experiments have been performed on 21 strains of mice (8 inbred, 3 outbred, 10 genetically modified mouse strains), 4 rat strains and 1 - hamsters. Effect of antidiabetic biguanides have been studied in 17 target organs/tissues. The majority was focused on mammary

**Table 1: Effects of antidiabetic biguanides on spontaneous and induced carcinogenesis in rodents**

| Target organ      | Species, strain            | Sex | Carcinogenic agent <sup>1</sup> | Drug <sup>2</sup> | Dose                | Route <sup>3</sup> | Effect <sup>4</sup> | References |
|-------------------|----------------------------|-----|---------------------------------|-------------------|---------------------|--------------------|---------------------|------------|
| Mammary gland     | C3H/Sn mice                | F   | MMTV                            | PF                | 2 mg/mouse          | oral               | ↓                   | [18, 19]   |
|                   | FVB/N mice                 | F   | HER-2/neu                       | MF                | 100 mg/kg           | d.w.               | ↓                   | [37, 45]   |
|                   | FVB/N mice                 | F   | HER-2/neu                       | MF                | 250 mg/kg           | i.p.               | ↓                   | [46]       |
|                   | FVB/N mice                 | F   | MMTV-neu;p53+/-                 | MF                | 1500 mg/kg          | diet               | =                   | [47]       |
|                   | FVB/N-Tg mice              | F   | MMTV-PyVT                       | PF                | 1.65 mg/ml          | d.w.               | ↓                   | [48]       |
|                   | FVB/N-Tg mice              | F   | MMTV-PyVT                       | MF                | 2 mg/ml             | d.w.               | ↓                   | [48]       |
|                   | SHR mice                   | F   | Spontaneous                     | MF                | 100 mg/kg           | d.w.               | =                   | [49]       |
|                   | LIO rats                   | F   | Spontaneous                     | PF                | 2 mg/rat            | oral               | ↓                   | [21, 36]   |
|                   | LIO rats                   | F   | DMBA                            | PF                | 5 mg/rat            | oral               | ↓                   | [17, 22]   |
|                   | LIO rats                   | F   | DMBA                            | BF                | 5 mg/rat            | oral               | ↓                   | [24]       |
|                   | LIO rats                   | F   | NMU                             | PF                | 1 mg/rat            | oral               | ↓                   | [23]       |
|                   | SD rats                    | F   | NMU                             | MF                | 5 mg/kg<br>50 mg/kg | oral<br>oral       | =<br>↓              | [50]       |
|                   | SD rats                    | F   | NMU                             | MF                | 110-220 mg/kg       | diet               | ↓                   | [51]       |
|                   | SD rats                    | F   | NMU                             | MF                | 5-50 mg/kg          | diet               | =                   | [47]       |
|                   | SD rats                    | F   | NMU                             | MF                | 9.3 mmol/kg         | diet               | =                   | [52]       |
|                   | SD rats                    | F   | NMU                             | PF                | 5 mmol/kg           | diet               | =                   | [52]       |
|                   | SD rats                    | F   | NMU                             | BF                | 7.6 mmol/kg         | diet               | ↓                   | [52]       |
|                   | Wistar rats                | F   | NMU+OV X                        | MF                | 2 mg/mL             | d.w.               |                     | [53]       |
|                   | LIO rats                   | F   | X-rays                          | PF                | 5 mg/rat            | oral               | ↓                   | [30]       |
| Pituitary gland   | LIO rats                   | F   | Spontaneous                     | BF                | 5 mg/rat            | oral               | ↓                   | [20]       |
|                   | LIO rats                   | F   | X-rays                          | PF                | 5 mg/rat            | oral               | ↓                   | [30]       |
| Thyroid gland     | LIO rats                   | F   | Spontaneous                     | BF                | 5 mg/rat            | oral               | ↓                   | [20]       |
|                   | LIO rats                   | F   | Spontaneous                     | PF                | 2 mg/rat            | oral               | ↓                   | [21]       |
| Skin              | SHR mice                   | F   | BP                              | MF                | 200 mg/L            | d.w.               | ↓                   | [54]       |
|                   | SHR mice                   | F   | BP                              | MF                | 200 mg/L            | d.w.               | ↓                   | [55]       |
|                   | FVB/N mice                 | F   | DMBA+TPA                        | MF                | 2-250 mg/kg         | d.w.               | ↓                   | [56]       |
| Soft tissues      | Outbred mice               | M   | MCA                             | PF                | 5 mg/kg             | oral               | ↓                   | [29]       |
|                   | SHR mice                   | F   | BP                              | MF                | 200 mg/L            | d.w.               | ↓                   | [57]       |
| Uterus            | Balb/c mice                | F   | E2, tamoxifen                   | MF                | 50 mg/kg            | diet               | ↓                   | [58]       |
|                   | 129/Sv mice                | F   | Spontaneous                     | MF                | 600 mg/L            | d.w.               | ↓                   | [59]       |
|                   | F344 rats                  | F   | Spontaneous                     | PF                | 400-800 ppm         | diet               | ↓                   | [60]       |
|                   | LIO rats                   | F   | Spontaneous                     | PF                | 2 mg/rat            | oral               | ↓                   | [21, 36]   |
|                   | LIO rats                   | F   | X-rays                          | PF                | 5 mg/rat            | oral               | ↓                   | [30, 36]   |
| Cervix utery      | SHR mice                   | F   | BP                              | MF                | 200 mg/L            | d.w.               | ↓                   | [61]       |
| Lung              | A/J mice                   | M&F | NNK                             | MF                | 250 mg/kg           | i.p.               | ↓                   | [62]       |
|                   | LID mice                   | M&F | NNK                             | MF                | 250 mg/kg           | d.w.               | ↓                   | [63]       |
|                   | 129/Sv mice                | M   | Urethan                         | MF                | 200 mg/L            | d.w.               | ↓                   | [64]       |
|                   | Swiss H mice               | M&F | Tobacco smoking                 | MF                | 800 pm              | diet               | ↓                   | [65]       |
| Oral mucosa       | C57BL/6 mice               | F   | 4-NQO                           | MF                | 50 mg/kg            | i.p.               | ↓                   | [66]       |
| Pancreas          | Hamsters                   | M   | NBOPA                           | MF                | 320 mg/kg           | oral               | ↓                   | [35]       |
|                   | p48Cre+; LSL-ras G12D mice | M&F | Spontaneous                     | MF                | 1000-2000 ppm       | diet               | ↓                   | [67]       |
|                   | KPC mice                   | M&F | Spontaneous                     | MF                | 1 mg/ml             | d.w.               | ↓                   | [68]       |
|                   | LSA+L-Kras; trp53 mice     | M&F | Adenovirus                      | MF                | 125 mg/kg           | i.p.               | ↓                   | [69]       |
| Pancreatic islets | CD1 mice                   | M   | HCFD                            | MF                | 50-250 mg/kg        | diet               | ↓                   | [70]       |

|                  |                      |     |                 |    |               |      |   |          |
|------------------|----------------------|-----|-----------------|----|---------------|------|---|----------|
| Liver            | C57BL/6 mice         | M   | NDEA            | MF | 250 mg/kg     | diet | ↓ | [71]     |
|                  | C57BL/6 mice         | M   | Spontaneous     | MF | 10 mg/kg      | diet | ↓ | [72]     |
|                  | C57BL/6 (HBxTg) mice | M   | HBx transgenic  | MF | 250 vg/kg     | oral | = | [73]     |
|                  | C57BL/6 mice         | M   | High fat diet   | MF | 250 mg/kg     | d.w. | ↓ | [74]     |
|                  | db/db mice           | F   | NDEA            | MF | 300 mg/kg     | d.w. | ↓ | [75]     |
|                  | Wistar rats          | M   | NDEA            | MF | 125 mg/kg     | oral | ↓ | [76]     |
|                  | Wistar rats          | M   | NDEA            | MF | 250 mg/kg     | oral | ↓ | [77]     |
| Small intestines | ApcMin/+ mice        | M&F | Spontaneous     | MF | 250 mg/kg     | diet | ↓ | [78]     |
|                  | PTEN+/- mice         | M&F | Spontaneous     | MF | 300 mg/kg     | d.w. | = | [79]     |
|                  | PTEN+/- mice         | M&F | Spontaneous     | PF | 300 mg/kg     | d.w. | = | [79]     |
| Colon            | BALB/c mice          | M&F | AOM             | MF | 250 mg/kg     | diet | ↓ | [80]     |
|                  | BALB/c mice          | M&F | AOM             | MF | 250 mg/kg     | d.w. | ↓ | [81]     |
|                  | BALB/c mice          | M&F | AOM             | MF | 250 mg/kg     | i.p. | ↓ | [81]     |
|                  | Swiss mice           | M   | DMH             | MF | 100-200 mg/kg | diet | ↓ | [82]     |
|                  | ICR mice             | M   | DMH + DSS       | MF | 240 mg/kg     | diet | ↓ | [83]     |
|                  | LIO rats             | F   | DMH             | PF | 5 mg/rat      | oral | ↓ | [25, 26] |
|                  | F344 rats            | M   | AOM             | MF | 15 mg/kg      | d.w. | ↓ | [80]     |
|                  | F344 rats            | M&F | AOM             | MF | 500-1000 ppm  | diet | = | [84]     |
|                  | F344 rats            | M&F | AOM             | MF | 1000 ppm      | diet | = | [85]     |
|                  | F344 rats            | M&F | AOM             | MF | 1000 ppm      | diet | = | [86]     |
|                  | SD rats              | M   | DMH+STZ         | MF | 150 mg/kg     | oral | ↓ | [87]     |
|                  | Wistar               | M   | DMH             | MF | 100-300 mg/kg | oral | ↓ | [88]     |
| Kidney           | Swiss H mice         | M&F | Tobacco smoking | MF | 800 ppm       | diet | ↓ | [65]     |
|                  | LIO rats             | M&F | NEU, t.pl.      | BF | 5 mg/rat      | oral | ↓ | [28]     |
| Lymphoid tissue  | B6C3F1 mice          | M&F | Spontaneous     | PF | 300-625 mg/kg | diet | ↓ | [60]     |
|                  | PTEN+/- mice         | M&F | Spontaneous     | MF | 300 mg/kg     | d.w. | = | [79]     |
|                  | PTEN+/- mice         | M&F | Spontaneous     | PF | 300 mg/kg     | d.w. | ↓ | [79]     |
|                  | C57BL/6-Ly5.2        | MF  | γ-irradiation   | MF | 250 mg/kg     | oral | ↓ | [89]     |
|                  | LIO rats             | F   | X-rays          | PF | 5 mg/rat      | oral | ↓ | [30]     |
| Nervous suystem  | LIO rats             | M&F | NMU, tr.pl.     | BF | 5 mg/rat      | oral | ↓ | [27]     |
|                  | LIO rats             | M&F | NEU, tr.pl.     | BF | 5 mg/rat      | oral | ↓ | [28]     |
| Total tumors     | B6C3F1 mice          | M&F | Spontaneous     | PF | 400-800 ppm   | diet | = | [60]     |
|                  | SHR mice             | F   | Spontaneous     | MF | 600 mg/L      | d.w. | = | [49]     |
|                  | 129/Sv mice          | M&F | Spontaneous     | MF | 600 mg/L      | d.w. | ↓ | [59]     |
|                  | 129/Sv mice          | M   | Spontaneous     | MF | 100 mg/kg     | s.c. | ↓ | [90]     |
|                  | 129/Sv mice          | F   | Spontaneous     | MF | 100 mg/kg     | s.c. | = | [90]     |
|                  | B6C3F1 mice          | M   | Spontaneous     | MF | 10 mg/kg      | diet | = | [76]     |
|                  | C57BL/6 mice         | M   | Spontaneous     | MF | 10 mg/kg      | diet | = | [76]     |
|                  | LIO rats             | F   | Spontaneous     | BF | 5 mg/rat      | oral | ↓ | [20]     |
|                  | LIO rats             | F   | Spontaneous     | PF | 2 mg/rat      | oral | ↓ | [21]     |
|                  | LIO rats             | F   | X-rays          | PF | 5 mg/rat      | oral | ↓ | [30, 36] |
|                  | F344 rats            | M&F | Spontaneous     | PF | 400-800 ppm   | diet | = | [60]     |

Notes: M, Male; F, Female.

<sup>1</sup> Carcinogenic agents: AOM, azoxymethane; BP, benzo(a)pyrene; DMBA, 7,12-dimethylbenz(a)anthracene; DMH, 1,2-dimethylhydrazine; DSS, dextrane sodium sulphur; E2, estradiol-17β; HCHFD, high carbohydrate fat diet; HER-2/neu, transgen; LID, liver-IGF-1-deficient mice; MCA, 20-methylcholanthrene; MMTV, murine mamary tumor virus; NBOPA, N-nitrosobis(2-oxopropyl)amine; NDEA, N-nitrosodiethylamine; NEU, N-nitrosoethylurea; NMU, N-nitrosomethylurea; NKK, 4-(methylnitrosamino)-1-(3-pyridyl)-1-butanone; 4-NQO, 4-nitroquinoline-1-oxide; STZ, streptozotocin; TPA, 12-O-tetradecanoylphorbol-13-acetate.

<sup>2</sup> Drugs: BF, buformin; MF, metformin; PF, phenformin.

<sup>3</sup> Route of administration: diet, with lab chow; d.w., drinking water; i.p., intraperitoneally; oral, gavage; s.c., subcutaneously; tr.pl., transplacental.

<sup>4</sup> Effect: ↓, inhibition of tumor incidence and/or tumor multiplicity, and/or increase of tumor latency; =, no effect.



gland (21 experiments) and colon tumors (11 studies), uterus (5) and liver (7) that reflects the importance of these localizations for clinical practice. Effect of biguanides on total tumor incidence was evaluated in 8 studies. Positive results only (inhibitory effect) induced by treatment with biguanides have been observed in 13 localizations (76%). In colon cancer models, 8 of 11 studies (72.7%) revealed of positive effect of biguanides, whereas in mammary tumor the inhibitory effect of these drugs was shown 15 out 21 experiments (71.4%) and 6 studies (28.6%) failed to show inhibitory effect of the drugs. It worthy to note that there were no cases observed of stimulation of any type of carcinogenesis with antidiabetic biguanides. Only in one study the obese and diabetic mice were used.[87] In all studies on effect of biguanides on induced carcinogenesis, young adult rodents were commonly used, and only in one article the results of the treatment with MF started at the young, adult and old age have been published.[91] Also, only one study was focused on tumorigenesis in mice neonatally exposed to MF.[90] Comprehensive analysis of the results of experimental studies on anti-carcinogenic effect of antidiabetic biguanides has been done recently. [92-104]

### Impact of dose and route of administration on effects of metformin

The selection of adequate dose of MF is one of most discussed questions. Some authors believe that the doses of MF used in *in vitro* studies much more than concentration of MF in the blood of patients.[15] Graham et al. [105] have shown that after a single dose a peak plasma concentration of MF in T2D patients was in ranges from 0.5 to 2 µg/mL (4 µM to 15 µM). In the majority of *in vitro* studies MF inhibited tumor growth in doses from 0.5 to 50 mM. It seems really much more than in human. In studies on antitumor effect using xenografts of human tumors into athymic nude mice as well as with transplantable tumor lines, MF was given with drinking water in the concentrations from 0.1 to 5 mg/mL, orally or intraperitoneally in doses of from 50 to 300 mg/kg of the body weight. [92, 93, 96, 97] In the studies of anticarcinogenic potential of MF it was administered with drinking water in concentrations from 0.1 to 1 mg/mL, with diet in doses from 800 to 2000 ppm, orally in doses from 100 to 300 mg/kg of the body weight (Table 1). After repeated administration, MF does not accumulate in the plasma and did not bind to plasma proteins. Biodistribution of [<sup>14</sup>C]-labeled MF has been studied in mice 1 hour after intraperitoneal (i.p.) injection (250 mg/kg) or gavage (5 mg/mL), and in mice allowed to drink oral MF dissolved in water (5 mg/mL) *ad libitum* during 5 days. [63] The authors observed practically similar patterns of MF distribution after a single i.p. or gavage administration with MF levels about 4.5 times higher in

liver than in lungs. Absolute levels of MF was 6.1 µM in plasma of mice that were allowed to drink MF *ad libitum* whereas in mice exposed to a single i.p. injection or gavage – 29.1 and 12.27 µM respectively. It was estimated that human equivalent dose (milligram per kilogram) equal to animal dose (milligram per kilogram) x animal  $K_m$  / human  $K_m$ , where species and  $K_m$  values are based on body surface area ( $K_m$  for adult human weighted 60 kg is 37, and  $K_m$  for mouse weighted 20 g is 3.[106] Tan et al. [69] calculated that daily i.p. administration of 125 mg/kg MF into mice is equivalent to human dose 600 mg/average size person of 60 kg and concluded that the dose of 125 mg/kg is approximately 4 times less than the maximum safe dose of MF (2500 mg/day). Thus, doses MF less than 500 mg/kg in mice yielded plasma level of MF practically similar to that in diabetic patients. Our calculation have shown that used in our experiments dose of MF 100 mg/kg equal to 300 mg/m<sup>2</sup> of the surface area. Recalculation for humans gives in average 510 mg/m<sup>2</sup>, that is much less that commonly used in clinical practice (1.0 – 2.5 g per day). We believe that studies on the effect of various routes of metformin administration at various doses levels will very helpful for a search most optimal regimens for prevention and treatment of cancer.

### CONCLUSIONS

The history of biguanides in oncology started in 70th of last century at N.N. Petrov Research Institute of Oncology by Dilman and his colleagues is rather dramatic and seems not came to “a happy end” at present time. First publications in 1974-1982 showing the high potential of PF and BF in prevention of spontaneous and induced by chemical carcinogens, X-rays and viruses carcinogenesis were not met an interest adequate to the degree of real importance of these finding. Whereas the both *in vitro* and *in vivo* experiments provide new evidences of anti-carcinogenic potential of biguanides, and the majority of clinical observations clearly demonstrates protective effect of MF in relation to many localization of cancer (see Box 1), there are some publications on results of clinical trials that are inconclusive and sometime were demonstrated adverse effect of MF. [34, 107] Recently Bio Med Central Biology published interview with N. Chandel [108] who as an explanation of possible reasons for this inconsistency cited rather sardonic comment of M. Pollack – one of the leaders in the topic: “The problem with metformin is it’s cheap, it’s widely available, it has a great safety profile, and anyone can use it”. Really, it is difficult to say better... In PubMed, under the words such as “metformin and cancer” the number of indexed papers were increasing exponentially from zero in 1990 to more than 2500 last September. Among them around 185 reviews on the topic were published only during last 5 years. So there are too many works and still there is no final conclusion. May be the time became to make this long story short. We

**Box 1: Antidiabetic biguanides as geroprotectors and anti-carcinogens: milestones**

| Year      | Phenomenon being shown in the first time                                                                                                          |
|-----------|---------------------------------------------------------------------------------------------------------------------------------------------------|
| 1971      | Vladimir Dilman originally developed idea that antidiabetic biguanides may be promising as geroprotectors and anticancer drugs [16]               |
| 1974      | Phenformin inhibits mammary carcinogenesis induced by DMBA in rats [17]                                                                           |
| 1977      | Phenformin alleviates metabolic immunodepression induced by DMH in rats [25]                                                                      |
| 1979      | Phenformin inhibits spontaneous carcinogenesis and increases of the life span in female C3H/Sn mice [18]                                          |
| 1980      | Bufornin inhibits spontaneous carcinogenesis, postpones of estrus cycle switching-off and increases the life span in female rats [20]             |
| 1980      | Bufornin inhibits transplacental carcinogenesis induced by NMU in rats [27]                                                                       |
| 1982      | Phenformin inhibits spontaneous carcinogenesis and the increase of the life span in female rats [21]                                              |
| 1982      | Phenformin inhibits carcinogenesis induced by X-rays irradiation in rats [30]                                                                     |
| 2001      | Metformin inhibits pancreatic carcinogenesis induced by NBOPA in hamsters [35]                                                                    |
| 2005      | Metformin inhibits spontaneous carcinogenesis and the increase of the life span in female HER-2/neu transgenic mice [37]                          |
|           | Metformin decreases the risk of cancer in type 2 diabetes patients [38, 39]                                                                       |
| 2008      | Metformin increases life span in outbred female SHR [49]                                                                                          |
| 2008-2014 | Treatment with metformin prevent spontaneous and/or induced carcinogenesis in:<br>2008: small intestines [79]; lymphoid tissue [79]               |
|           | 2009: uterus [58]                                                                                                                                 |
|           | 2010: cervix [61]; skin [54]; soft tissues [57]; lung [62]; pancreatic islets [70]; colon [80]                                                    |
|           | 2012: oral mucosa [66]; liver [71]                                                                                                                |
|           | 2013: pancreas [67]<br>2014: kidney [65]                                                                                                          |
| 2014      | Diabetes type 2 patients treated with metformin monotherapy have 15% longer survival than matched controls without diabetes [5]                   |
| 2015      | Announcing the project TAME (Targeting Aging with Metformin) suggesting delay age-related diseases and increase survival in elderly people [3, 4] |

believe that efficacy of MF should be evaluated according to criteria, experience and rules of the WHO International Agency for Research on Cancer.

**ACKNOWLEDGMENTS**

This work was supported in part by grant # 14-04-01653 from the Russian Foundation for Basic Research.

**CONFLICTS OF INTEREST**

I declare that I have no conflicts of interest.

**REFERENCES**

1. Preamble to the IARC Handbooks of Cancer Prevention. IARC Handbooks of Cancer Prevention. Carotenoids. Vol.2, Lyon: IARC, 1998; 2:3-14.
2. Taubes G. Cancer prevention with a diabetes pill? Science 2012; 335: 29
3. Hayden EC. Anti-ageing pill pushed as bona fide drug. Nature 2015;522:265-6.
4. Hall SS. A trial for the ages. Science 2015; 349: 1275-8.
5. Bannister CA, Holden SE, Jenkins-Jones S, Morgan CL, Halcox JP, Schernthaner G, Mukherjee J, Currie CJ.

Can people with type 2 diabetes live longer than those without? A comparison of mortality in people initiated with metformin or sulphonylurea monotherapy and matched, non-diabetic controls. Diabetes Obes Metab 2014;16:1165-73.

6. Del Barco S, Vazquez-Martin A, Cufi S, Oliveras-Ferraros C, Bosch-Barrera J, Joven J, Martin-Castillo B, Menendez JA.. Metformin: multi-faceted protection against cancer. Oncotarget 2011;2:896-917.
7. Martin-Castillo B, Vazquez-Martin A, Oliveras-Ferraros C, Menendez JA. Metformin and cancer. Doses, mechanisms and the dandelion and hermetic phenomena. Cell Cycle 2010;9:1057-64.
8. Corominas-Faja B, Quirantes-Piné R, Oliveras-Ferraros C, Vazquez-Martin A, Cufi S, Martin-Castillo B, Micol V, Joven J, Segura-Carretero A, Menendez JA. Metabolomic fingerprint reveals that metformin impairs one-carbon metabolism in a manner similar to the antifolate class of chemotherapy drugs. Aging (Albany NY) 2012;4:480-98.
9. Blagosklonny MV. Validation of anti-aging drugs by treating age-related diseases. Aging (Albany NY) 2009;28;1(3):281-8.
10. Blagosklonny MV. Metformin and sex: Why suppression of aging may be harmful to young male mice. Aging (Albany NY) 2010;2(12):897-9.
11. Blagosklonny MV. Answering the ultimate question “what

- is the proximal cause of aging?" *Aging* (Albany NY) 2012; 4: 861-7.
12. Blagosklonny MV. Common drugs and treatments for cancer and age-related diseases: revitalizing answers to NCI's provocative questions. *Oncotarget* 2012; 3:1711-24.
  13. Blagosklonny MV. Metformin and sex: Why suppression of aging may be harmful to young male mice. *Aging* (Albany NY). 2010;2(12):897-9.
  14. Blagosklonny MV. Selective anti-cancer agents as anti-aging drugs. *Cancer Biol Ther* 2013;14:1092-7.
  15. Pollak M. Potential applications for biguanides in oncology. *J Clin Invest* 2013;123:3693–700.
  16. Dilman, VM. Age-associated elevation of hypothalamic threshold to feedback control and its role in development, aging and disease. *Lancet* 1971; 1:1211-9.
  17. Dilman VM, Berstein LM, Zabezhinski MA, Alexandrov VA. On influence of phenformin on induction of mammary tumors in rats. *Vopr Onkol* 1974;20(9):94-7.
  18. Dilman VM, Anisimov VN. Increase in longevity and a decrease in the frequency of tumors in C3H/Sn mice under the influence of phenformin and diphenin. *Dokl Akad Nauk SSSR* 1979;245(3):753-7.
  19. Dilman VM, Anisimov VN. Effect of treatment with phenformin, diphenylhydantoin or L-DOPA on life span and tumor incidence in C3H/Sn mice. *Gerontology* 1980;26:241–5.
  20. Anisimov VN. Effect of buformin and diphenylhydantoin on life span, estrus function and spontaneous tumor incidence in female rats. *Vopr Onkol* 1980;6:42-8.
  21. Anisimov VN. The effect of phenformin on life span, estrous function and incidence of spontaneous tumors in ras. *Farmakol Toksikol* 1982; 45(4):127 (Dep.VINITI 5.10.81, №4686-81DEP)
  22. Dilman VM, Berstein LM, Zabezhinski MA, Alexandrov VA, Pliss GB. Inhibition of DMBA-induced carcinogenesis by phenformin in the mammary gland of rats. *Arch Geschwulstforsch* 1978;48:1-8.
  23. Anisimov VN, Belous NM, Vasilyeva IA, Dilman VM. Inhibitory effect of phenformin on the development of mammary tumors induced by N-nitrosomethylurea in rats. *Exp Onkol* 1980;3:40-3.
  24. Anisimov VN, Ostroumova MN, Dilman VM. Inhibition of blastomogenic effect of 7,12-dimethylbenz(a)-anthracene in female rats by buformin, diphenylhydantoin, polypeptide pineal extract and L-DOPA. *Bull Exp Biol Med* 1980;89:723-5.
  25. Dilman VM, Sofronov BN, Anisimov VN, Nazarov PG, L'vovich EG. Phenformin elimination of the immunodepression caused by 1,2-dimethylhydrazine in rats. *Vopr Onkol* 1977;23(8):50-4.
  26. Anisimov VN, Pozharisski KM, Dilman VM. Effect of phenformin on the blastomogenic action of 1,2-dimethylhydrazine in rats. *Vopr Onkol* 1980;26(8):54-8.
  27. Alexandrov VA, Anisimov VN, Belous NM, Vasilyeva IA., Mazon VB. The inhibition of the transplacental blastomogenic effect of nitrosomethylurea by postnatal administration of buformin to rats. *Carcinogenesis* 1980;1: 975-8.
  28. Bespalov VG, Alexandrov VA. Influence of anticarcinogenic agents on the transplacental carcinogenic effect of N-nitroso-N-ethylurea. *Bull Exp Biol Med* 1985; 100:73-6.
  29. Vinnitski VB, Iakimenko VA. Effect of phenformin, L—DOPA and para-chlorophenylalanine on the immunological reactivity and chemical carcinogenesis in BALB/c mice. *Vopr Onkol* 1980;27(6):45-50.
  30. Anisimov VN, Belous NM, Prokudina EA. Inhibition by phenformin of the radiation carcinogenesis in female rats. *Exp Onkol* 1982;4 (6):26-9.
  31. Anisimov VN. *Carcinogenesis and Aging*. Vol 2. Boca Raton, FL. CRC Press. 1987, 146 p.
  32. Dilman VM. Ageing, metabolic immunodepression and carcinogenesis. *Mech Ageing Dev* 1978;8:153-73.
  33. Dilman VM, Berstein LM, Yevtushenko TP, Tsyrlina YV, Ostroumova MN, Bobrov YuF, Revskoy SYu, Kovalenko IG, Simonov NN. Preliminary evidence on metabolic rehabilitation in cancer patients. *Arch Geschwulstforsch* 1988;58:175-83.
  34. Berstein LM. *Biguanides: An Expansion to Practical Oncology (past and present)*.- St.Petersburg: Aesculap, 2010, 160 p.
  35. Schneider MB, Matsuzaki H, Haorah J, Ulrich A, Standop J, Ding XZ, Adrian TE, Pour PM.. Prevention of pancreatic cancer induction in hamsters by metformin. *Gastroenterology* 2010;120:1263–70.
  36. Anisimov VN, Semenchenko AV, Yashin AI. Insulin and longevity: antidiabetic biguanides as geroprotectors. *Biogerontology* 2003;4:297–307.
  37. Anisimov VN, Berstein LM, Egormin PA, Piskunova TS, Popovich IG, Zabezhinski MA, Kovalenko IG, Poroshina TE, Semenchenko AV, Provinciali M, Re F, Franceschi C. Effect of metformin on life span and on the development of spontaneous mammary tumors in HER-2/neu transgenic mice. *Exp Gerontol* 2005;40:685-93.
  38. Evans JM, Donnelly A, Emslie-Smith AM, Alessi DR, Morris AD. Metformin and reduced risk of cancer in diabetic patients. *BMJ* 2005; 330:1304-5.
  39. Bowker SL, Majumdar SR, Veugelers P, Johnson JA. Increased cancer-related mortality for patients with type 2 diabetes who use sulfonylurea or insulin. *Diabetes Care* 2006; 29:254-8.
  40. Wu L, Zhu L, Prokop LJ, Murad MH. Pharmacologic therapy of diabetes and overall cancer risk and mortality: a meta-analysis of 265 studies. *Sci Rep* 2015; 5,10147; doi: 10.1038/srep10147.
  41. Moiseeva O, Deschênes-Simard X, Pollak M, Ferbeyre G. Metformin, aging and cancer. *Aging* (Albany NY).

- 2013;5(5):330-1.
42. Cardel M, Jensen SM, Pottgard A, Jorgensen TL, Hallas J. Long-term use of metformin and colorectal cancer risk in type II diabetics: a population-based case-control study. *Cancer Med* 2014; Aug 5; doi:10.1002/cam4.306.
  43. Kourelis TV, Siegel RD. Metformin and cancer: new applications for an old drug. *Med Oncol* 2012; 29: 1314-1327.
  44. Kasznicki J, Sliwinska A, Drzewoski ZJ. Metformin in cancer prevention and therapy. *Ann Transl Med* 2014; 2(6):57. doi: 10.3978/j.issn.2305-5839.3024.06.01
  45. Anisimov VN, Egormin PA, Piskunova TS, Popovich IG, Tyndyk ML, Yurova MN, Zabezhinski MA, Anikin IV, Karkach AS, Romanyukha AA. Metformin extends life span of HER-2/neu transgenic mice and in combination with melatonin inhibits growth of transplantable tumors *in vivo*. *Cell Cycle* 2010;9:188-97.
  46. Zhu P, Davis M, Blackwelder AJ, Bachman N, Liu B, Edgerton S, Williams LL, Thor AD, Yang X. Metformin selectively targets tumor-initiating cells in ErbB2-overexpressing breast cancer models. *Cancer Prev Res (Phila)*. 2014; 7:199-210.
  47. Thompson MD, Grubbs CJ, Bocde AM, Reid JM, McGovern R, Bernard PS, Stijleman IJ, Green JE, Bennett C, Juliana MM, Moeinpour F, Steele VE, Lubet RA. Lack of effect of metformin on mammary carcinogenesis in nondiabetic rat and mouse models. *Cancer Prev Res* 2015; doi: 10.1158/1940-6207.CAPR-14-0181-T.
  48. Orecchioni S, Reggiani F, Talarico G, Mancuso P, Calleri A, Gregato G, Labanca V, Noonan DM, Dallaglio K, Albini A, Bertolini F. The biguanides metformin and phenformin inhibit angiogenesis, local and metastatic growth of breast cancer by targeting both neoplastic and microenvironment cells. *Int J Cancer* 2015;136(6):E534-44. doi: 10.1002/ijc.29193.
  49. Anisimov VN, Berstein LM, Egormin PA, Piskunova TS, Popovich IG, Zabezhinski MA, Tyndyk ML, Yurova MN, Kovalenko IG, Poroshina TE, Semenchenko AV. Metformin slows down aging and extends life span of female SHR mice. *Cell Cycle* 2008;7:2769-73.
  50. Bojkova B, Orendas P, Garajlova M, Kassayova M, Kutna V, Ahlersova E, Ahlers I. Metformin in chemically-induced mammary carcinogenesis in rats. *Neoplasma* 2009;56:69-274.
  51. Zhu Z, Jiang W, McGinley JN, Thompson HJ. Comparison of metformin, pheformin and buformin in mammary carcinogenesis in non-obese, non-diabetic rats. In: Proc of the 104th Annual Meeting of the AACR, April 6-10, 2013, Washington DC, Abstract 2272.
  52. Zhu Z, Jiang W, Thompson MD, Echeverria D, McGinley JN, Thompson HJ. Effects of metformin, buformin, and phenformin on the post-initiation stage of chemically induced mammary carcinogenesis in the rat. *Cancer Prev Res (Phila)*. 2015; 8:518-27.
  53. Giles ED, Wellberg EA, Astling DP, Anderson SM, Thor AD, Jindal S, Tan AC, Schedin PS, Maclean PS. Obesity and overfeeding affecting both tumor and systemic metabolism activates the progesterone receptor to contribute to postmenopausal breast cancer. *Cancer Res*. 2012;72(24):6490-501.Gils
  54. Deriabina ON, Plotnikova NA, Anisimov VN. Melatonin and metformin inhibits skin carcinogenesis induced by benzo(a)pyrene in mice. *Vopr Onkol* 2010;56:583-7.
  55. Mancheva TA, Demidov DV, Plotnikova NA, Kharitonova TV, Paschkevich IV, Anisimov VN. Melatonin and metformin inhibit skin carcinogenesis and lipid peroxidation induced by benzo(a)pyrene in female mice. *Bull Exp Biol Med* 2011;151: 339-42.
  56. Checkley LA, Rho O, Angel JN, Cho J, Blando J, Beltran L, Hursting SD, DiGiovanni J. Metformin inhibits skin tumor promotion in overweight and obese mice. *Cancer Prev Res (Phila)* 2014;7:54-64.
  57. Deriabina ON. Inhibitory effect of melatonin and metformin on carcinogenesis induced by benzo(a)pyrene in various tissues of female mice. St.Petersburg: Ph.D. Diss, NN Petrov Res Inst Oncology, 2010.
  58. Erdemoglu E, Güney M, Giray SG, Take G, Mungan T. Effects of metformin on mammalian target of rapamycin in a mouse model of endometrial hyperplasia. *Eur J Obstet Gynec Rep Biol*. 2009;145:195-9.
  59. Anisimov VN, Piskunova TS, Popovich IG, Zabezhinski MA, Tyndyk ML, Egormin PA, Yurova MN, Semenchenko AV, Kovalenko I.G, Poroshina TE, Berstein LM Gender differences in metformin effect on aging, life span and spontaneous tumorigenesis in 129/Sv mice. *Aging (Albany, NY)* 2010; 2: 945-58.
  60. Bioassay of Phenformin for Possible Carcinogenicity. CAS No. 114-86-3; NCI-CG-TR-7. Natl Cancer Institute. Carcinogenesis. Technical Report Series No. 7, January 1977. US DHEW. Public Health Service, NIH.
  61. Deriabina ON, Plotnikova NA, Kharitonova TV, Kirichenko EV, Soldatov OM, Pashkevich IV, Anisimov VN. Melatonin and metformin inhibits development of cervicovaginal tumors induced by benzo(a)pyrene in mice. *Morphol Vedomosti* 2010;2:36-41.
  62. Memmott, RM, Mercado, JR, Maier, CR, Kawabata S, Fox, SD, Dennis, PA. Metformin prevents tobacco carcinogen-induced lung tumorigenesis. *Cancer Prev Res* 2010;3:1066-76.1
  63. Quinn BJ, Dallos, M, Kitagawa H, Cho J, Blando J, Beltran L, Hursting SD, DiGiovanni J. Inhibition of lung tumorigenesis by metformin is associated with decreased plasm IGF-I and diminished receptor tyrosine kinase signaling. *Cancer Prev Res* 2013; 6:801-10.
  64. Popovich IG, Piskunova TS, Tyndyk ML, Anikin IV, Zabezhinski MA, Anisimov VN. Effect of metformin on urethane-induced lung carcinogenesis in mice. *Vopr Onkol* 2012; 58:549-53.



65. Izzotti A, Balansky R, D'Agostini F, Longobardi M, Cartiglia C, Micale RT, La Maestra S, Camoirano A, Ganchev G, Ilcheva M, Steele VE, De Flora S. Modulation by metformin of molecular and histopathological alterations in the lung of cigarette smoke-exposed mice. *Cancer Med* 2014; 3(3):719-30.
66. Vitale-Cross L, Molinolo AA, Martin D, Younis RH, Maruyama T, Patel V, Chen W, Schneider A, Gutkind JS. Metformin prevents the development of oral squamous cell carcinomas from carcinogen-induced premalignant lesions. *Cancer Prev Res* 2012;5:562-73.
67. Mohammed A, Janakira NB, Brewer M, Ritchie RL, Marya A, Lightfoot S, Steele VE, Rao CV. Antidiabetic drug metformin prevents progression of pancreatic cancer by targeting in part cancer stem cells and mTOR signaling. *Transl Ocol* 2013; 6:649-59.
68. Hermann PC, Sancho P, Cañamero M, Martinelli P, Madriles F, Michl P, Gress T, de Pascual R, Gandia L, Guerra C, Barbacid M, Wagner M, et al. Nicotine promotes initiation and progression of KRAS-induced pancreatic cancer via Gata6-dependent dedifferentiation of acinar cells in mice. *Gastroenterology* 2014;147(5): 1119-33.e4. doi: 10.1053/j.gastro.2014.08.002.
69. Tan XL, Bhattacharyya KK, Dutta SK, Bamlet WR, Rabe KG, Wang E, Smyrk TC, Oberg AL, Petersen GM, Mukhopadhyay D. Metformin suppresses pancreatic tumor growth with inhibition of NFkB/STAT3 inflammatory signal. *Pancreas* 2015;44:636-47.
70. Hou M, Venier N, Sugar L, Pollak M, Kiss A, Fleshner N, Klotz L, Venkateswaran V. Protective effect of metformin in CD1 mice placed on a high carbohydrate-high fat diet. *Biochem Biophys Res Commun* 2010;397:537-42.
71. Bhalla, K, Hwang, BJ, Dewi, RE, Twaddel W, Goloubeva OG, Wong KK, Saxena NK, Biswal S, Girnun GD. Metformin prevents liver tumorigenesis by inhibiting pathways driving hepatic lipogenesis. *Cancer Prev Res (Phila)* 2012;5:544-52.
72. Martin-Montalvo A, Mercken EM, Mitchell SJ, Palacios HH, Mote PL, Scheibye-Knudsen M, Gomes AP, Ward TM, Minor RK, Blouin MJ, Schwab M, Pollak M, et al. Metformin improves healthspan and lifespan in mice. *Nat Commun* 2013;4:2192. doi: 10.1038/ncomms3192.
73. Kim JH, Alam MM, Park DB, Cho M, Lee SH, Jeon YJ, Yu DY, Kim TD, KimHY, Cho CG, Lee DH. The Effect of metformin treatment on CRBP-I level and cancer development in the liver of HBx transgenic mice. *Korean J Physiol Pharmacol* 2013;17:455-61.
74. Tajima K, Nakamura A, Shirakawa J, Togashi Y, Orime K, Sato K, Inoue H, Kaji M, Sakamoto E, Ito Y, Aoki K, Nagashima Y. Metformin prevents liver tumorigenesis induced by high-fat diet in C57Bl/6 mice. *Am J Physiol Endocrinol Metab* 2013;305:E987-98.
75. Ohno T, Shimizu M, Shirakami Y, Baba A, Kochi T, Kubota M, Tsurumi H, Tanaka T, Moriwaki H. Metformin suppresses diethylnitrosamine-induced liver tumorigenesis in obese and diabetic C57Bl/KsJ+Leprdb/+Leprdb mice. *PLoS One*. 2015;10(4):e0124081. doi: 10.1371/journal.pone.0124081. eCollection 2015.
76. Afzal M, Kazmi I, Gupta G, Rahman M, Kimothi V, Anwar F. Preventive effect of metformin against N-nitrosodiethylamine-initiated hepatocellular carcinoma in rats. *Saudi Pharm J* 2012; 20:365-70.
77. DePeralta DK, WeiL, Lauwers GY, Fuch BC, Tanabe KK. Metformin inhibits hepatocellular carcinoma in a cirrhosis model. *J Surg Res* 2014;186:633.
78. Tomimoto A, Endo H, Sugiyama M, Fujisawa T, Hosono K, Takahashi H, Nakajima N, Nagashima Y, Wada K, Nakagama H, Nakajima A. Metformin suppresses intestinal polyp growth in ApcMin/+ mice. *Cancer Sci* 2008;99:2136-41.
79. Huang X, Wullschlegler S, Shpiro N. Important role of the LKB1-AMPK pathway in suppressing tumorigenesis in PTEN-deficient mice. *Biochem J* 2008;412:211-21.
80. Hosono K, Endo H, Takahashi H, Sugiyama M, Uchiyama T, Suzuki K, Nozaki Y, Yoneda K, Fujita K, Yoneda M, Inamori M, Tomatsu A, et al. Metformin suppresses azoxymethane-induced colorectal aberrant crypt foci by AMP-activating protein kinase. *Mol Carcinogenesis* 2010;49:662-71.
81. Abd AH, Hussein AG, Mahmood AS. Efficacy of intraperitoneal administration of metformin and 5-fluorouracil in prevention of induced colorectal aberrant crypt foci in mice. *Int J Pharmacy Pharmaceut Sci* 2014; 6:305-308.
82. Zaafar DK, Zaitone SA, Moustafa YM. Role of metformin in suppressing 1,2-dimethylhydrazine-induced colon cancer in diabetic and non-diabetic mice: effect on tumor angiogenesis and cell proliferation. *PLoS One* 2014; 9(6):e100562. doi: 10.1371/journal.pone. 0100562. eCollection 2014.
83. Li W, Wang QL, Liu X, et al. Combined use of vitamin D3 and metformin exhibits synergistic chemopreventive effects on colorectal neoplasia in rats and mice. *Cancer Prev Res (Phila)*. 2015;8(2):139-48.
84. Shimomoto T, Luo Y, Ohmori H, Chihara Y, Fujii K, Sasahira T, Denda A, Kuniyasu H. Advanced glycation end products (AGE) induce the receptor for AGE in the colonic mucosa of azoxymethane-injected Fischer 344 rats fed with a high-linoleic acid and high-glucose diet. *J Gastroenterol* 2012; 47:1073-83. doi: 10.1007/s00535-012-0572-5.
85. Madka, V, Zhang, Y, Brewer M, et al. Chemopreventive efficacy of bisphosphonates, Zometa and Fosamax, alone or in combination with phenformin in AO-induced rat colon cancer model. *Cancer Prev Res* 2013;6(11 Suppl): Abstract no. A14.
86. Rao, CV, Janakiram, NB, Mohammed, A, et al. Lack of chemopreventive effects of metformin in azoxymethane-induced rat colon carcinogenesis. *Cancer Prev Res* 2011;4(10 Suppl):B42.

87. Jia Y, Ma Z, Liu X, Zhou W, He S, Xu X, Ren G, Xu G, Tian K. Metformin prevents DMH-induced colorectal cancer in diabetic rats by reversing the Warburg effect. *Cancer Med* 2015; Sept 17 doi:10.1002/cam4521 [epub ahead of print]
88. Bekusova VV, Patsanovski VM, Nozdrachev AD, Anisimov VN. Metformin inhibits development of malignant colon tumors induced by 1,2-dimethylhydrazin in rats. *Dokl Akad Nauk*, 2015, in press
89. Xu G, Wu H, Zhang J, Li D, Wang Y, Wang Y, Zhang H, Lu L, Li C, Huang S, Xing Y, Zhou D, Meng A. Metformin ameliorates ionizing irradiation-induced long-term hematopoietic stem cell injury in mice. *Free Radic Biol Med* 2015;87:15-25.
90. Anisimov, VN, Popovich. IG, Zabezhinski, MA, Egormin PA, Yurova MN, Semenchenko AV, Tyndyk ML, Panchenko AV, Trashkov AP, Vasiliev AG, Khaitsev NV. Sex differences in aging, life span and spontaneous tumorigenesis in 129/Sv mice neonatally exposed to metformin. *Cell Cycle* 2015;14:46-55.
91. Anisimov, VN, Berstein, LM. Popovich, IG, Zabezhinski MA, Tyndyk ML, Egormin PA, Piskunova TS, Yurova, MN, Semenchenko, AV, Kovalenko, IG, Poroshina, TE. If started early in life, metformin increases life span and postpones tumors in female SHR mice. *Aging (Albany, NY)* 2011;3:148-57.
92. Anisimov VN. Metformin for aging and cancer prevention. *Aging (Albany NY)* 2010;2(11):760-74.
93. Anisimov V.N. Do metformin a real anticarcinogen? A critical reappraisal of experimental data. *Ann Transl Med* 2014; 2,6:60;2(6):60;2(6):60. doi: 10.3978/j.issn.2305-5839.2014.06.02.
94. Anisimov VN. Metformin and rapamycin are master-keys for understanding the relationship between cell senescent, aging and cancer. *Aging (Albany NY)*. 2013;5(5):337-8.
95. Anisimov VN. Metformin for prevention and treatment of colon cancer: a reappraisal of experimental and clinical data. *Current Drug Targets* 07.11.2014. Mar 3 [Epubl ahead of print].
96. Grossmann ME, Yang DQ, Guo Z, Potter DA, Cleary MP. Metformin treatment for the prevention and /or treatment of breast/mammary tumorigenesis. *Curr Pharmacol Rep* 2015;1 (5):312-323.
97. Li J, Hernanda PY, Bramer WM, Peppelenbosch MP, van Luijk J, Pan Q. Anti-tumor effects of metformin in animal models of hepatocellular carcinoma: a systematic review and meta-analysis. *PLoS One*. 2015 Jun 1;10(6):e0127967. doi: 10.1371/journal.pone.0127967. eCollection 2015.
98. Halicka HD, Zhao H, Li J, Lee YS, Hsieh TC, Wu JM, Darzynkiewicz Z. Potential anti-aging agents suppress the level of constitutive mTOR- and DNA damage- signaling. *Aging (Albany NY)* 2012 ;4(12):952-65.
99. Berstein LM. Metformin in obesity, cancer and aging: addressing controversies. *Aging (Albany NY)*. 2012;4(5):320-9.
100. Anisimov VN. Multifaceted aging and rapamycin. *Aging (Albany NY)*. 2013;5(7):487.
101. Menendez JA, Joven J. One-carbon metabolism: an aging-cancer crossroad for the gerosuppressant metformin. *Aging (Albany NY)*. 2012 Dec;4(12):894-8.
102. Menendez JA, Cufi S, Oliveras-Ferraros C, Martin-Castillo B, Joven J, Vellon L, Vazquez-Martin A. Metformin and the AM DNA damage response (DDR): accelerating the onset of stress-induced senescence to boost protection against cancer. *Aging (Albany NY)*. 2011;3(11):1063-77.
103. Halicka HD, Zhao H, Li J, Traganos F, Zhang S, Lee M, Darzynkiewicz Z. Genome protective effect of metformin as revealed by reduced level of constitutive DNA damage signaling. *Aging (Albany NY)*. 2011;3(10):1028-38.
104. Menendez JA, Cufi S, Oliveras-Ferraros C, Vellon L, Joven J, Vazquez-Martin A. Gerosuppressant metformin: less is more. *Aging (Albany NY)*. 2011;3(4):348-62.
105. Graham GG, Punt J, Arora ME, Day RO, Doogue MP, Duong JK, Furlong TJ, Greenfield JR, Greenup LC, Kirkpatrick CM, Ray JE, Timmins P, Williams KM. Clinical pharmacokinetics of metformin. *Clin Pharmacokinet* 2011;50: 81-98.
106. Reagan-Shaw, S, Nihal, M, Ahmad, N. Dose translation from animal to human studies revisited. *FASEB J* 2008;22:659-61.
107. Kowal B, Stang A, Rathmann W, Kostev K. No reduced risk of overall, colorectal, lung, breast, and prostate cancer with metformin therapy in diabetic patients: database analyses from Germany and the UK. *Pharmacoepidemiol Drug Saf* 2015 Jul 1. doi: 10.1002/pds.3823.
108. Chandel N. Four key questions about metformin and cancer. *BMC Biol*. 2014;24;12:85. doi: 10.1186/s12915-014-0085-1.
